# Supplementary material for: Enhanced electrochemiluminescence of gold nanoclusters via silver doping and their application for ultrasensitive detection of dopamine
Source: Royal Society of Chemistry journal article supplement (doi:10.1039/c9an00032a), 2019-01-01
Supplement: c9an00032a1.pdf [file c9an00032a1.pdf]

## Supporting Information

### **Enhanced electrochemiluminescence of gold nanoclusters via silver doping and its application for ultrasensitive detection of dopamine**

Yao Tang, Juntao Xu, Chengyi Xiong, Yan Xiao\*, Xiuhua Zhang, Shengfu Wang

*Hubei Collaborative Innovation Center for Advanced Organic Chemical Materials, Ministry of  
Education Key Laboratory for the Synthesis and Application of Organic Functional Molecules &  
College of Chemistry and Chemical Engineering, Hubei University, Wuhan 430062, PR China*

**\*Corresponding author:**

*E-mail addresses: xiaoyan@hubu.edu.cn (Y. Xiao),*

## Supplementary Figures and Table

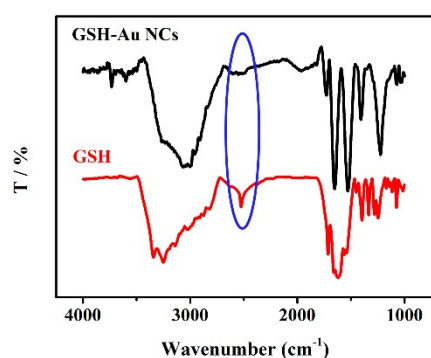

**Fig. S1.** FTIR spectra of the GSH-Au NCs and GSH.

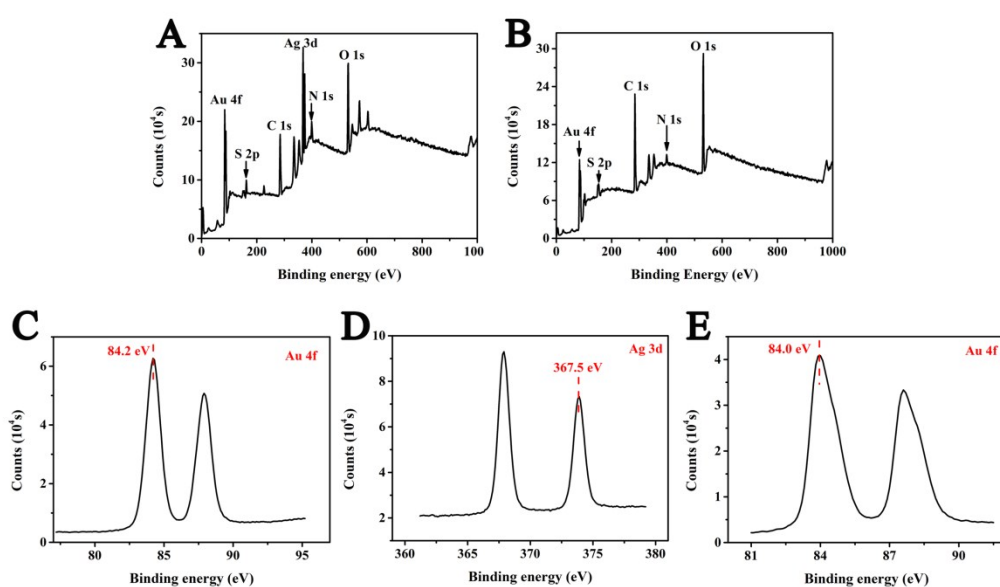

**Fig. S2.** (A-B) The XPS spectra of GSH-Ag/Au NCs (A) and GSH-Au NCs (B). (C-D) The XPS spectra of Au 4f (C) and Ag 3d (D) in GSH-Ag/Au NCs. (E) The XPS spectrum of Au 4f in GSH-Au NCs.

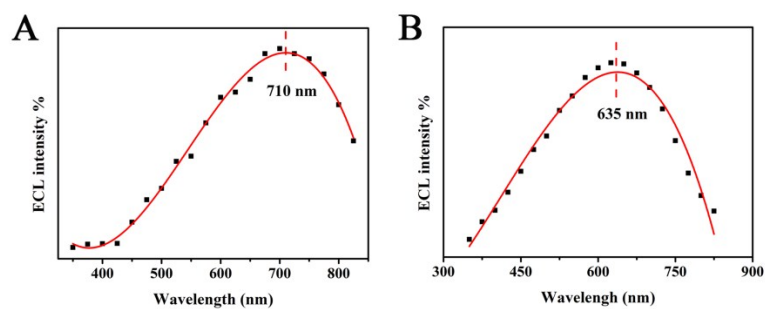

**Fig. S3.** ECL spectra of GSH-Ag/Au NCs (A) and GSH-Au NCs (B).

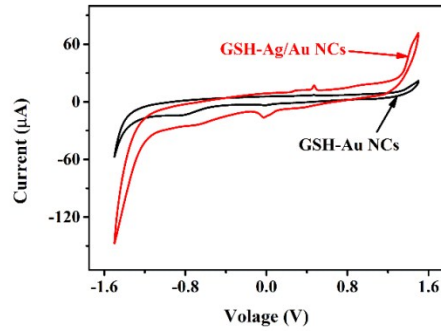

**Fig.S4.** Cyclic voltammety of GSG-Au NCs modified GCE and GSH-Ag/Au NCs modified GCE in 0.1M PBS.

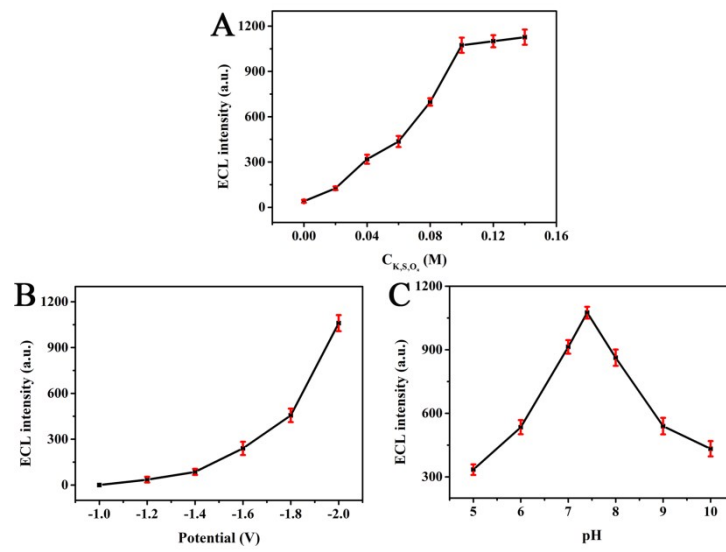

**Fig. S5.** Effects of  $K_2S_2O_8$  concentration (A), applied potential (B) and pH (C) on ECL intensity of GSH-Ag/Au NCs.

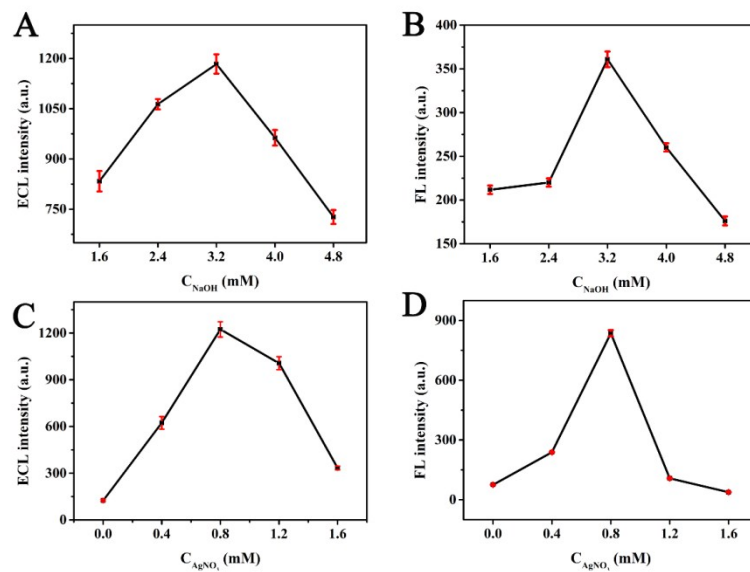

**Fig. S6.** (A-B) The ECL (A) and FL (B) intensities of GSH-Ag/Au NCs preparing upon different

NaOH concentration. (C-D) The ECL (C) and FL (D) intensities of GSH-Ag/Au NCs preparing upon different AgNO<sub>3</sub> concentration.

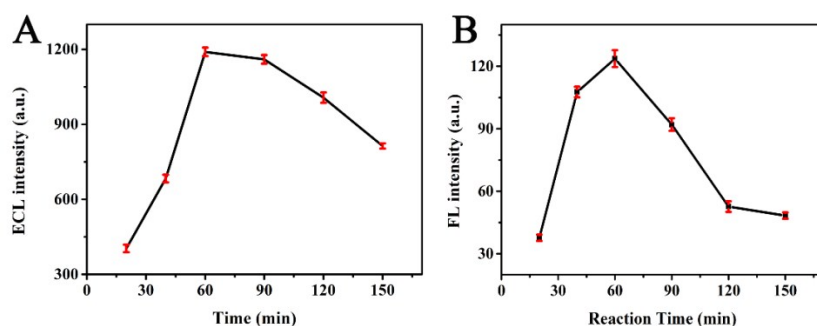

**Fig. S7.** The ECL (A) and FL (B) intensities of GSH-Ag/Au NCs preparing upon different heating time.

**Table S1.** Comparison of different methods for dopamine detection.

| Detection technique | Sensor                               | Linear range (M)                              | Detection limit (M)  | References |
|---------------------|--------------------------------------|-----------------------------------------------|----------------------|------------|
| ECL                 | rGO/MWCNTs/AuNPs                     | $2 \times 10^{-7} \sim 7 \times 10^{-5}$      | $6.7 \times 10^{-8}$ | 1          |
| ECL                 | Ag <sub>2</sub> Se QDs               | $5 \times 10^{-7} \sim 1.9 \times 10^{-5}$    | $1 \times 10^{-7}$   | 2          |
| ECL                 | BSA-AuNCs/ITO                        | $2.5 \times 10^{-6} \sim 4.75 \times 10^{-5}$ | $2.5 \times 10^{-6}$ | 3          |
| ECL                 | CdSe QDs.                            | $3.7 \times 10^{-6} \sim 4.5 \times 10^{-4}$  | $1 \times 10^{-7}$   | 4          |
| DPV <sup>a</sup>    | Mn <sub>3</sub> O <sub>4</sub> NPs   | $1.0 \times 10^{-5} \sim 7.0 \times 10^{-5}$  | $1 \times 10^{-7}$   | 5          |
| SWV <sup>b</sup>    | SWCNT/Fe <sub>2</sub> O <sub>3</sub> | $3.2 \times 10^{-6} \sim 3.18 \times 10^{-5}$ | $3.6 \times 10^{-7}$ | 6          |
| FL                  | ZnSe QD-ferritin                     | $1 \times 10^{-7} \sim 6 \times 10^{-7}$      | $1 \times 10^{-7}$   | 7          |
| ECL                 | GSH-AuAgNCs                          | $1 \times 10^{-8} \sim 1 \times 10^{-3}$      | $2.3 \times 10^{-9}$ | This work  |

<sup>a</sup>DPV, differential pulse voltammetry

<sup>b</sup>SWV, square wave voltammetry.

## References

- [1] D. H. Yuan, S. H. Chen, R. Yuan, J. J. Zhang, X. F. Liu, *Sensor Actuat B-Chem.*, 2014, 191, 415-420.
- [2] R. Cui, Y. P. Gu, L. Bao, J. Y. Zhao, B. P. Qi, Z. L. Zhang, Z. X. Xie and D. W. Pang, *Anal. Chem.*, 2012, 84, 8932-8935.
- [3] L. I. Li, H. Y. Liu, Y. Y. Shen, J. R. Zhang and J. J. Zhu, *Anal. Chem.*, 2011, 83, 661-665.
- [4] A. J. Stewart, J. Hendry and L. Dennany, *Anal. Chem.*, 2015, 87, 11847-11853.
- [5] W. W. Gao, S. Y. Ye, M. W. Shao, *J. Phys. Chem. Solids*, 2011, 72, 1027-1031.
- [6] A. S. Adekunle, B. O. Agboolab, J. Pillay, K. I. Ozoemena, *Sensor Actuat B-Chem*, 2010, 148, 93-102.

[7] E. A. Choi and S. J. Park, *Jpn. J. Appl. Phys.*, 2013, 53, 01AF03.
